# Supplementary material
Source: Springer Nature journal article supplement (https://www.springermedizin.de/resource/supplementary/12936_2012_2555_MOESM2_ESM.pdf/9543178)

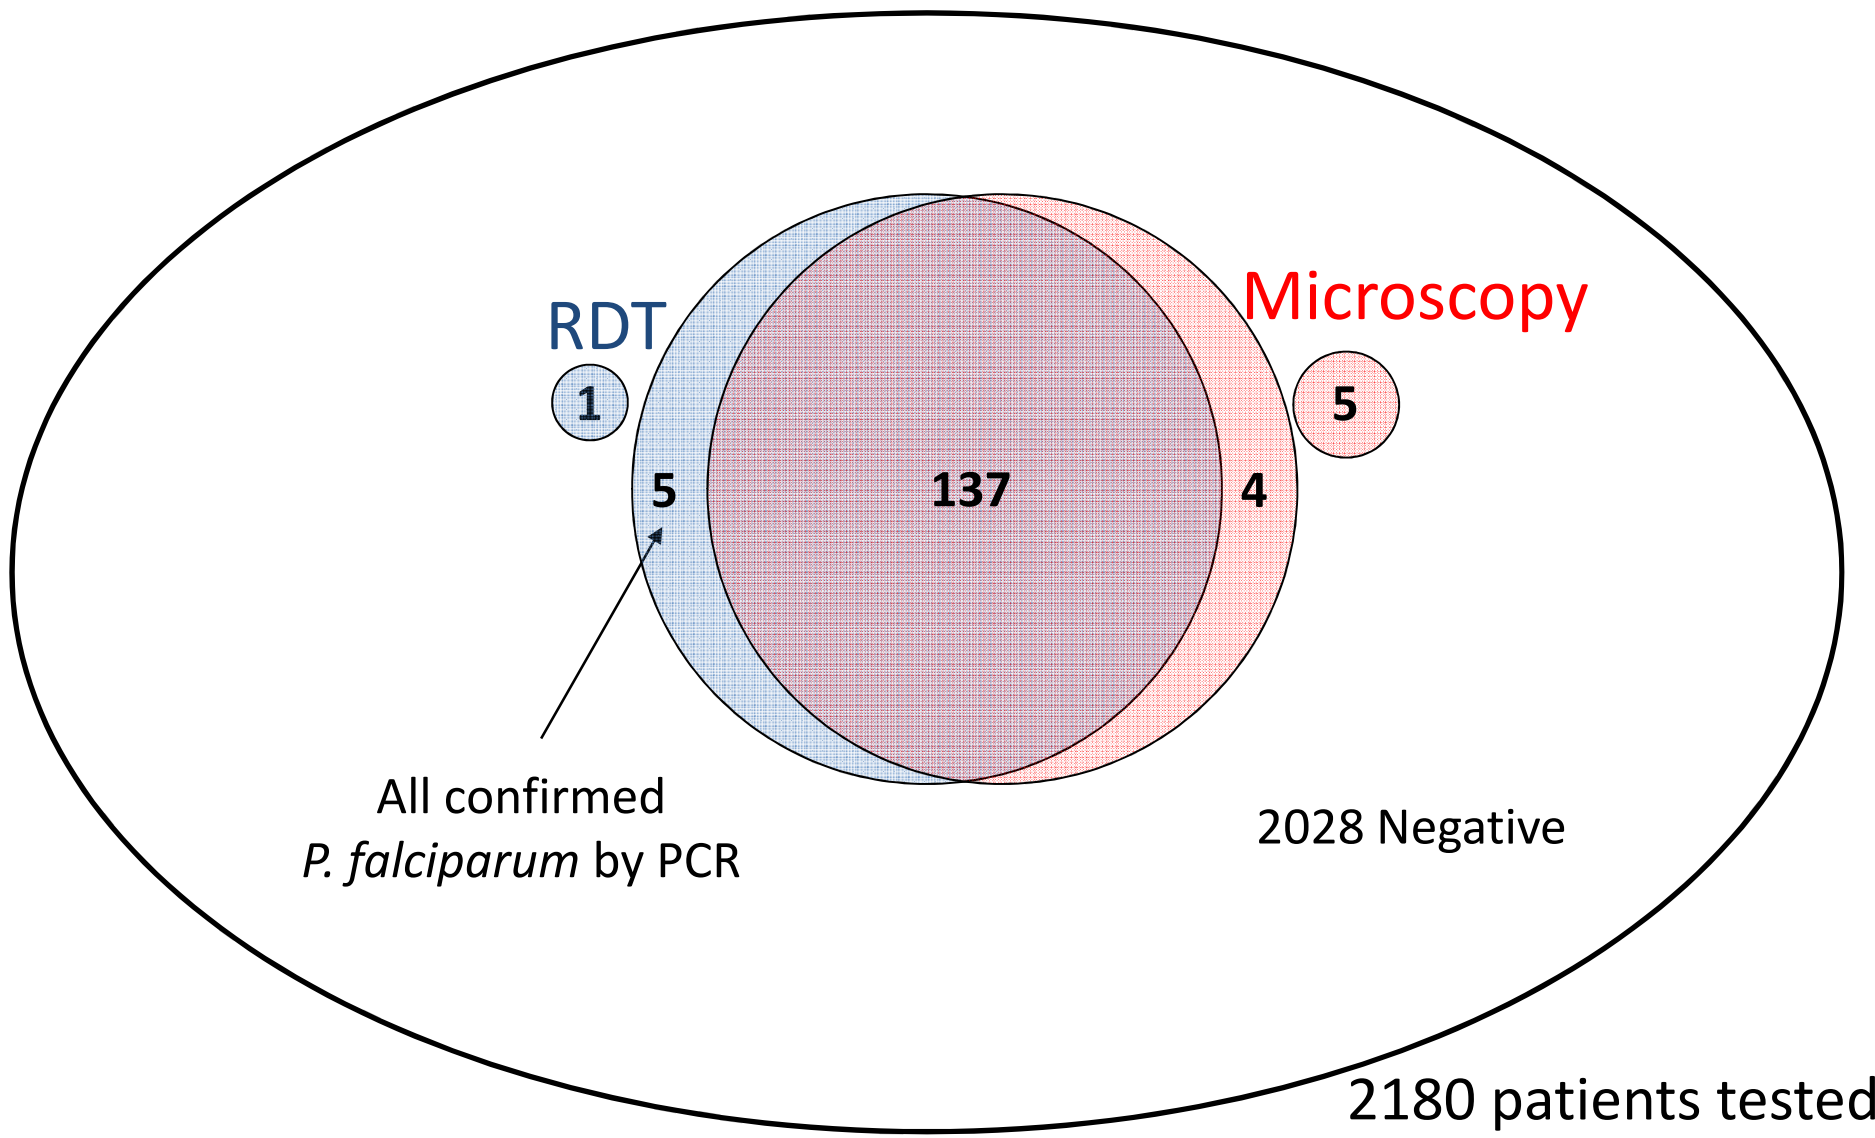

RDT

1

5

137

Microscopy

5

4

All confirmed  
*P. falciparum* by PCR

2028 Negative

2180 patients tested

Supplement: MOESM2 [file 9543178]
